# Supplementary material for: Modified Four-Point Scleral Suture Fixation Technique for Repositioning a Dislocated Intraocular Lens in the Absence of Capsule Support
Source: Hindawi journal article supplement (doi:10.1155/2020/8824896), 2020-11-18
Supplement: f1 [file 8824896.f1.docx]

Supplemental Table 1. Comparison of IOL tilt and decentration in four-point scleral suture fixation, two-point scleral suture fixation and phacoemulsification

|  | Horizontal  decentration (mm) | Vertical  decentration (mm) | Horizontal  tilt (degree) | Vertical  tilt (degree) |
| --- | --- | --- | --- | --- |
| Four-point Fixation | 0.23±0.12 | 0.18±0.13 | 1.36±0.35 | 1.31±0.14 |
| Two-point Fixation-1 [5] | 0.62±0.31 | | 6.35±3.09 | |
| Two-point Fixation-2 [16] | 0.67±0.43 | | 6.09±3.80 | |
| Phacoemulsification-1[17] | 0.25±0.18 | 0.19±0.15 | 1.68±0.43 | 1.52±0.44 |
| Phacoemulsification-2[18] | 0.28±0.22 | 0.26±0.20 | 1.53±0.76 | 1.58±0.73 |
| Phacoemulsification-3[19] | 0.23±0.19 | 0.19±0.20 | 1.17±0.75 | 1.56±0.82 |

The data of the four-point fixation was obtained in this study, and the data of the two-point fixation and phacoemulsification was cited from other studies.
